# Supplementary material for: Switching the intracellular pathway and enhancing the therapeutic efficacy of small interfering RNA by auroliposome
Source: PubMed Central journal article supplement — Sci Adv. 2020 Jul 22;6(30):eaba5379. doi: 10.1126/sciadv.aba5379 (PMC7375829; doi:10.1126/sciadv.aba5379), 2020-07-22
Supplement: aba5379_SM.pdf [file aba5379_SM.pdf]

[advances.sciencemag.org/cgi/content/full/6/30/eaba5379/DC1](https://advances.sciencemag.org/cgi/content/full/6/30/eaba5379/DC1)

## Supplementary Materials for

### **Switching the intracellular pathway and enhancing the therapeutic efficacy of small interfering RNA by auroliposome**

Md. Nazir Hossen, Lin Wang, Harisha R. Chinthalapally, Joe D. Robertson, Kar-Ming Fung, Stefan Wilhelm, Magdalena Bieniasz, Resham Bhattacharya, Priyabrata Mukherjee\*

\*Corresponding author. Email: [priyabrata-mukherjee@ouhsc.edu](mailto:priyabrata-mukherjee@ouhsc.edu)

Published 22 July 2020, *Sci. Adv.* **6**, eaba5379 (2020)  
DOI: [10.1126/sciadv.aba5379](https://doi.org/10.1126/sciadv.aba5379)

#### **This PDF file includes:**

Figs. S1 to S9

**A**

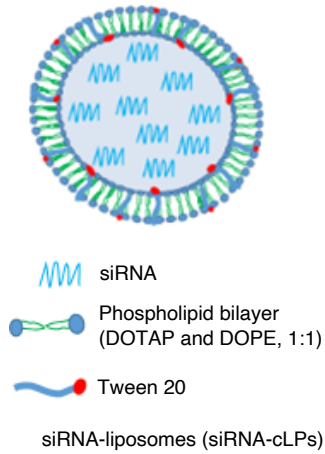

**B**

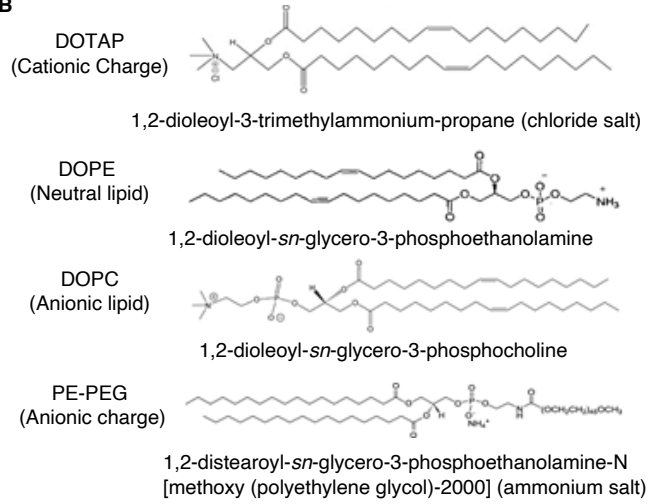

**C**

| Formulation ID | Lipid Compositions      | Ratio of Lipid (w/w) | Lipid/siRNA (w/w) ratio |
|----------------|-------------------------|----------------------|-------------------------|
| E-LPs          | DOTAP:DOPE              | 50:50                | 25:0                    |
| F1             | DOTAP:DOPE              | 50:50                | 25:1                    |
| F2             | DOTAP:DOPE :DOPC        | 40:10:50             | 25:1                    |
| F3             | DOTAP:DOPE :DOPC        | 30:30:40             | 25:1                    |
| F4             | DOTAP:DOPE :DOPC:PE-PEG | 30:10:40:20          | 25:1                    |
| F5             | DOTAP:DOPE :DOPC:PE-PEG | 30:20:40:10          | 25:1                    |
| F6             | DOTAP:DOPE :DOPC:PE-PEG | 30:25:40:5           | 25:1                    |
| F7             | DOTAP:DOPE              | 50:50                | 25:1                    |
| F8             | DOTAP:DOPE :PE-PEG      | 50:50:0.1            | 25:1                    |
| F9             | DOTAP:DOPE :PE-PEG      | 50:50:0.2            | 25:1                    |
| F10            | DOTAP:DOPE :PE-PEG      | 50:50:0.5            | 25:1                    |

**D**

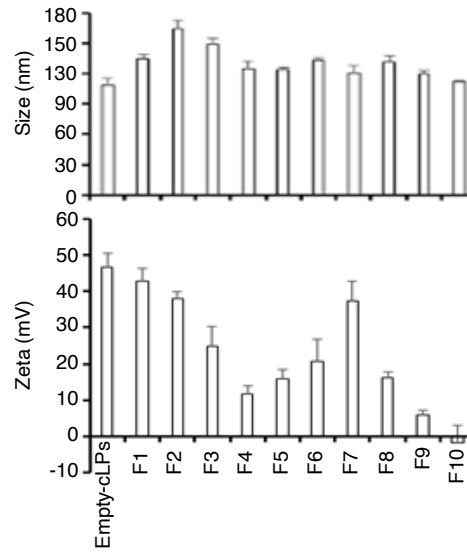

**E**

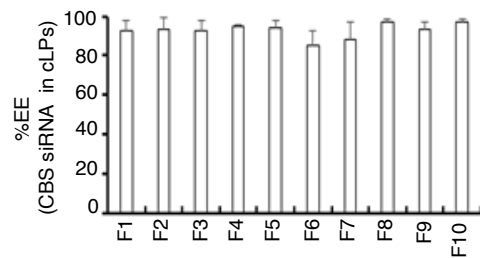

**F**

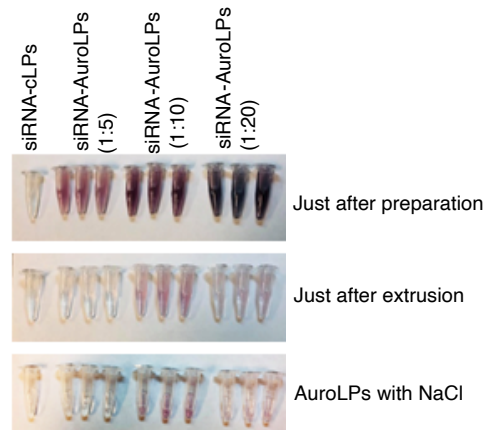

**fig. S1.** Compositions and physicochemical characterization of liposomal formulations. **(A)** Schematic representation of siRNA-cLPs. **(B)** Chemical structure of utilized lipids for the formulation of siRNA-LPs. **(C)** Modulation of lipid compositions for the preparation of siRNA-LPs. **(D)** The size and zeta potential of CBS-siRNA-LPs, as denoted by F1, F2, F3, F4, F5, F6, F7, F8, F9, F10 and empty-LPs were measured by dynamic light scatter microscopy (DLS). **(E)** Entrapment of CBS-siRNA into LPs was measured using Ribogreen assay (n=3). **(F)** The photographs showed the optimization of ratio of siRNA/AuNP. Photo credit: M. N. Hossen (Oklahoma University Health Science Centre).

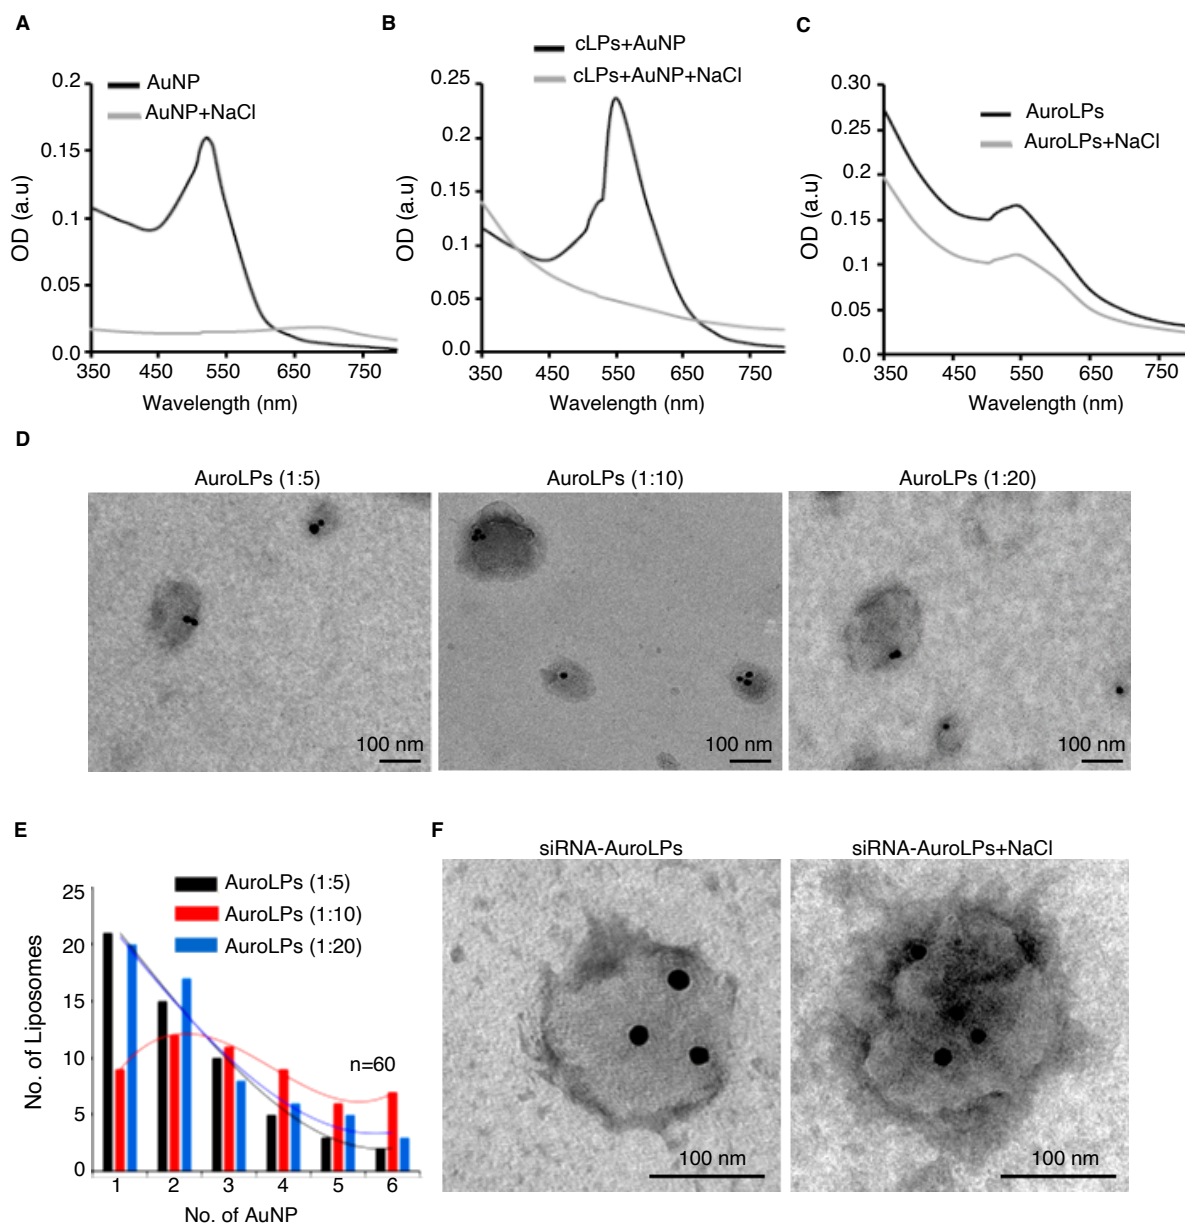

**fig. S2.** Aggregation study of AuroLPs using UV-vis and transmission electron microscopy (TEM). (A-C) UV-Vis spectrum of without or with NaCl of AuNP, cLPs+AuNP and AuroLPs. (D) 0.2% uranyl acetate (UA) stained auroliposomes at various ratio of siRNA/AuNP (1:5; 1:10 and 1:20) that were visualized under TEM and its corresponding number of AuNP in auroliposomal formulations (n=60 of each ratio) (E). (F) TEM images of AuroLPs and AuroLPs+NaCl. Scale bar: 100 nm.

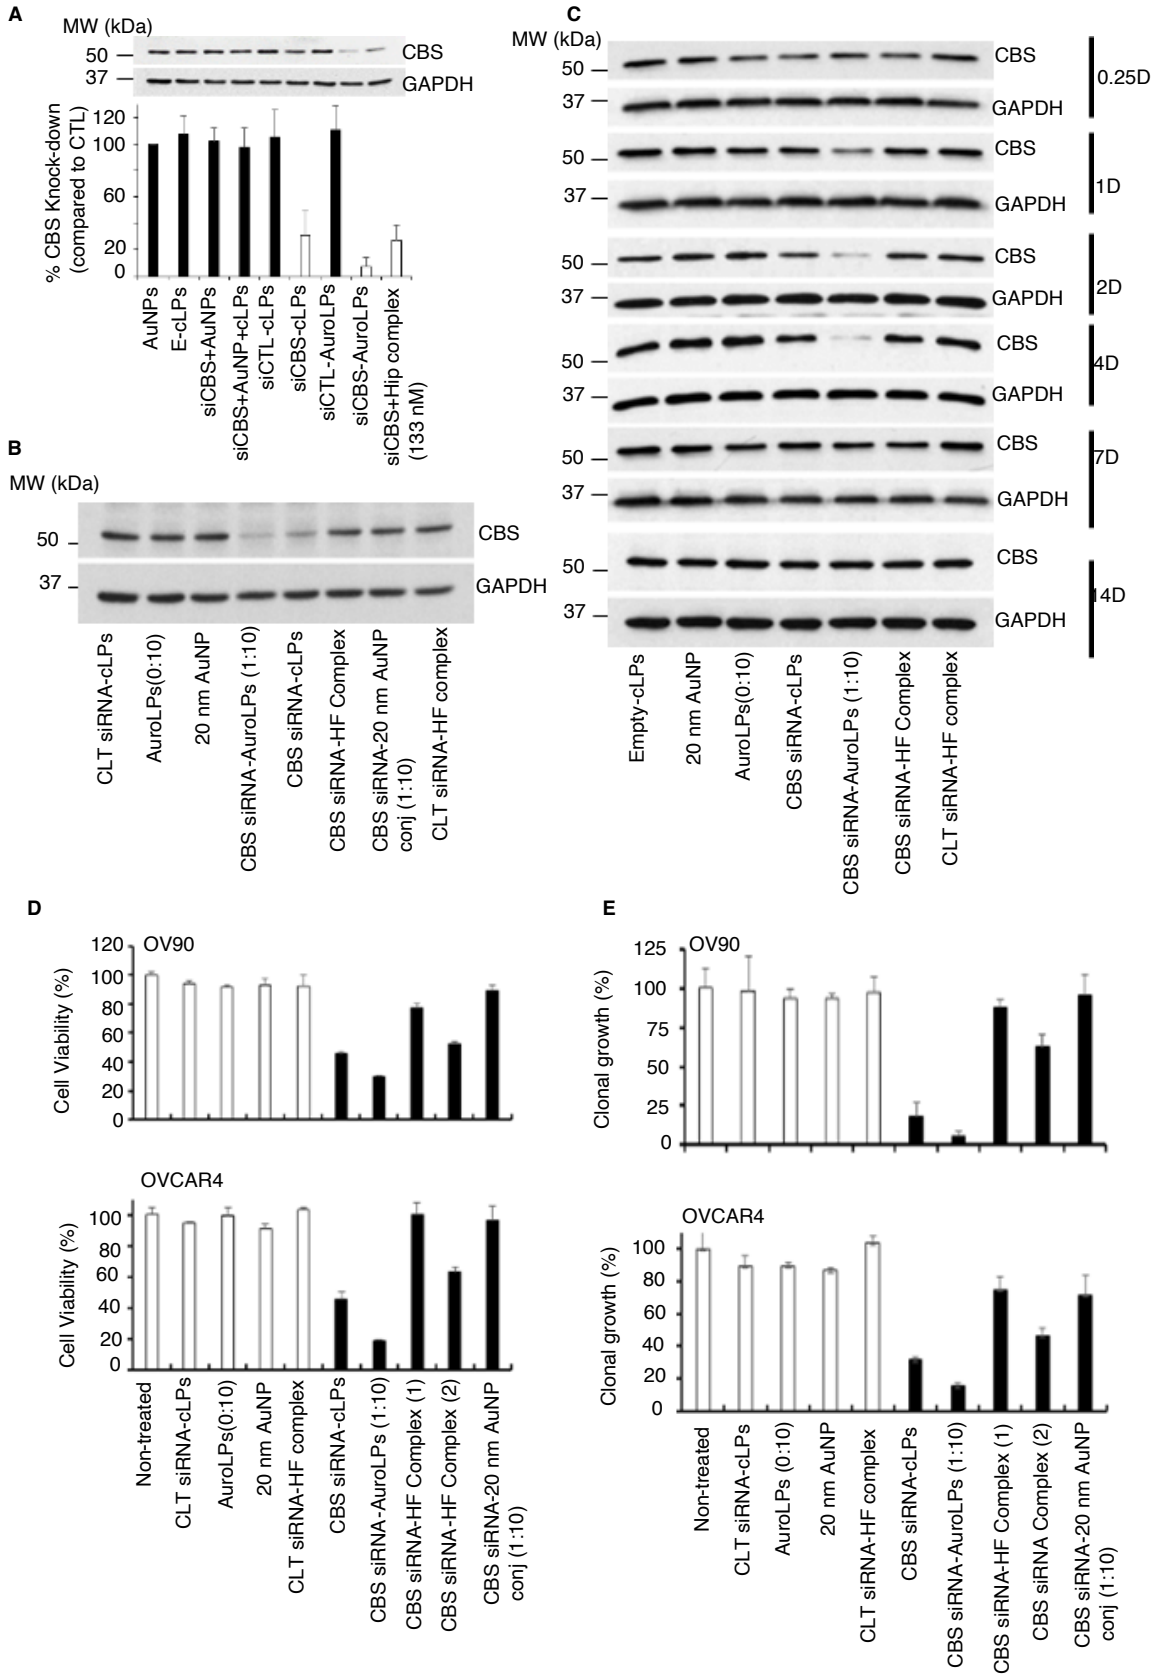

**fig. S3.** Silencing and its stability and viability of cancer cells as a function of CBS-siRNA-AuroLPs treatment. **(A)** Silencing activity of CBS-siRNA-AuroLPs. OV90 ( $2 \times 10^5$ ) were cultured overnight in the presence of 10% FBS media and were then treated with AuNPs, empty-cLPs, AuNP+CBS-siRNA, AuNP+CBS-siRNA+empty-cLPs, control siRNA-cLPs, control siRNA-AuroLPs, CBS-siRNA-AuroLPs, and CBS-siRNA-cLPs at a final siRNA dose of 25 nM, whereas complex (133 nM) at a final concentration of 133 nM siRNA. A 48h post incubation, the extent of CBS silencing was determined at the protein level by western blot. GAPDH was used as a loading control. **(B)** Silencing activity of CBS-siRNA-AuroLPs. OVCAR4 cells ( $2 \times 10^5$ ) were cultured overnight in the presence of 10% FBS media and were then treated with control siRNA-cLPs, AuroLPs, 20 nm AuNP, CBS-siRNA-AuroLPs, CBS-siRNA-cLPs, complex and conjugate at a final concentration of 25nM siRNA. A 48h post incubation, the extent of CBS silencing was determined at the protein level by western blot. GAPDH was used as a loading control. **(C)** Stability of silencing activity. OVCAR4 cells ( $2 \times 10^5$ ) were cultured overnight in the presence of 10% FBS media and were then treated with AuroLPs, 20 nm AuNP, CBS-siRNA-AuroLPs, CBS-siRNA-cLPs, complex, control siRNA complex and empty-cLPs at a final concentration of 25 nM siRNA. A 6h, 1D, 2D, 4D, 7D and 14D post incubation, the extent of CBS silencing was determined at the protein level by western blot. GAPDH was used as a loading control. **(D)** Cell viability. Cells (OVCAR4 and OV90) were grown in 96 well plate at a density of 3000 cells/ well overnight and were then treated either control siRNA-cLPs, AuroLPs, 20 nm AuNP, CBS-siRNA-AuroLPs, CBS-siRNA-cLPs, complex and conjugate at the same dose or complex at a dose of 133 nM or remains untreated. Post 48h cells viability was measured by MTT assay (n=6). **(E)** Clonal growth. OVCAR4 and OV90 cells (200 cells/well in 6 cm dish) were co-transfected with either control siRNA-cLPs, AuroLPs, 20 nm AuNP, CBS-siRNA-AuroLPs, CBS-siRNA-cLPs, complex

and conjugate at the same dose or complex at a dose of 133 nM or remains untreated. After 12 (OVCAR4) or 8 (OV90) days, colonies were stained with crystal violet, imaged and counted by using colony counter machine (n=3).

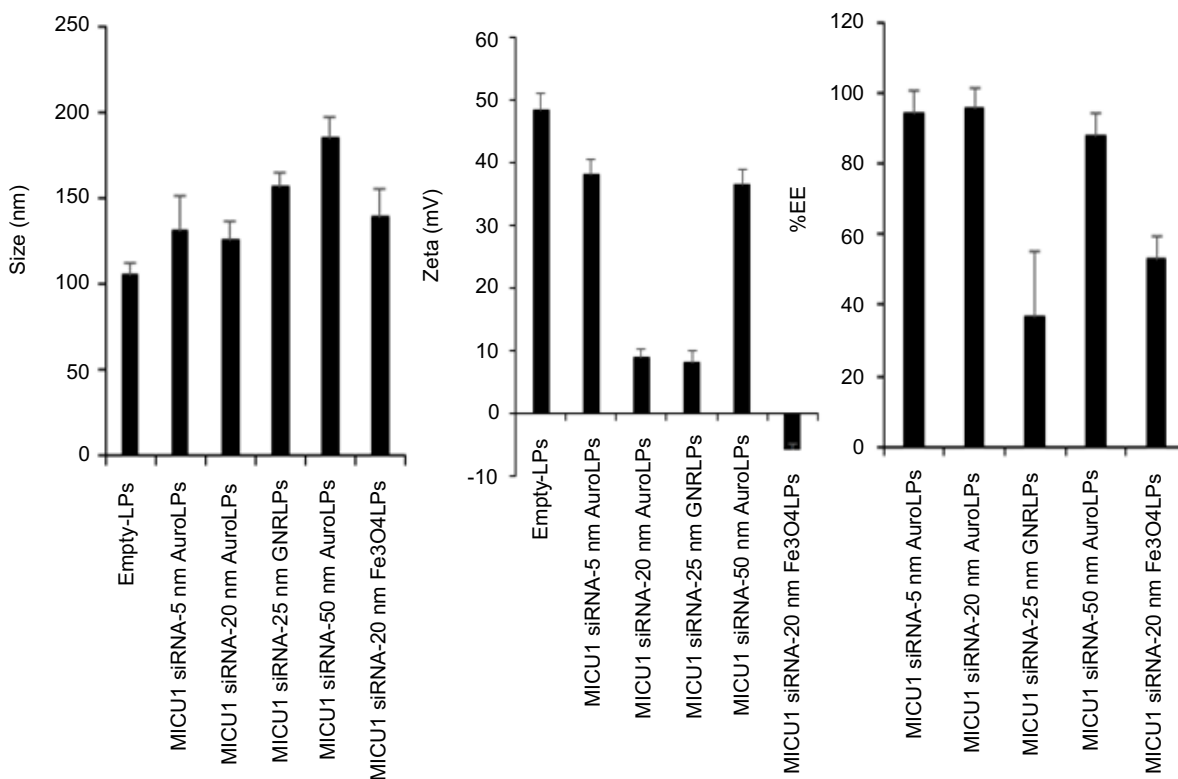

**fig. S4.** Physicochemical characterizations and encapsulation efficiency of siRNA-AuroLPs and Fe<sub>3</sub>O<sub>4</sub>LPs. **(A-B)** The size and zeta potential of empty-cLPs, siRNA-5 nm AuroLPs (oval), siRNA-AuroLPs (oval), siRNA-50 nm AuroLPs (oval), siRNA-25 nm AuroLPs (rod) and siRNA-20 nm Fe<sub>3</sub>O<sub>4</sub>LPs (oval) were measured by dynamic light scatter microscopy (DLS). **(C)** Entrapment efficiency of MICU1-siRNA into 5 nm AuroLPs (oval), AuroLPs (oval), 50 nm AuroLPs (oval), 25 nm AuroLPs (rod) and 20 nm Fe<sub>3</sub>O<sub>4</sub>LPs (oval) was determined by using ribogreen assay (n=3).



**A**

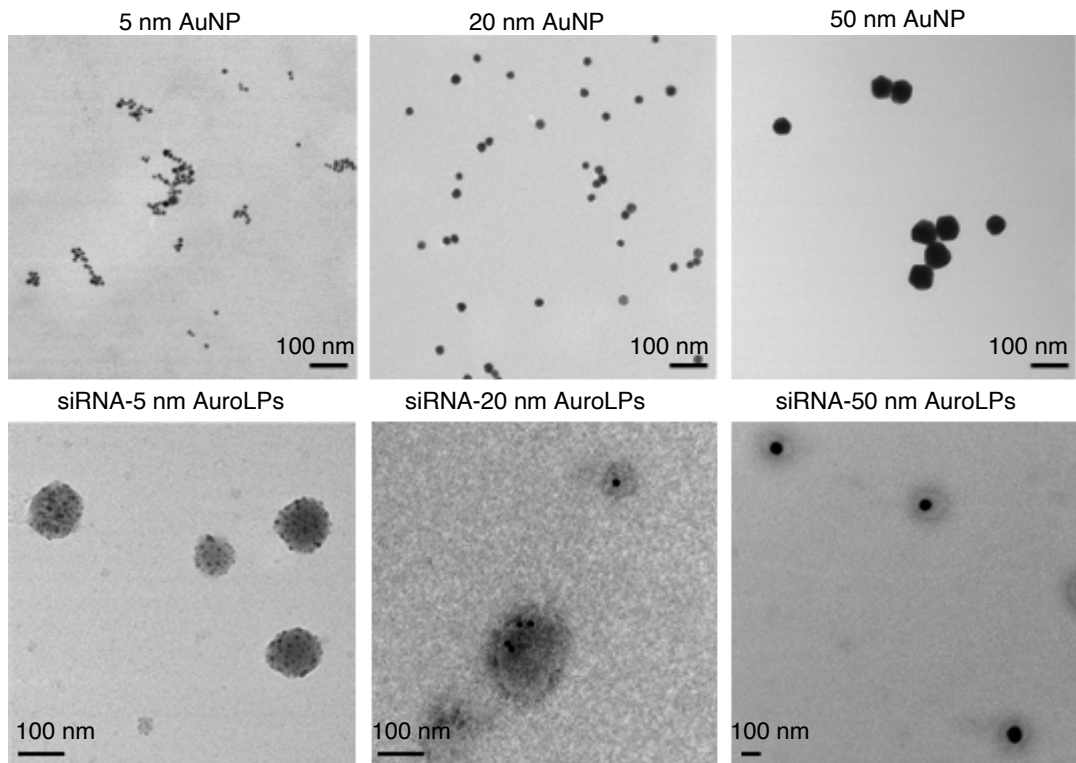

**B**

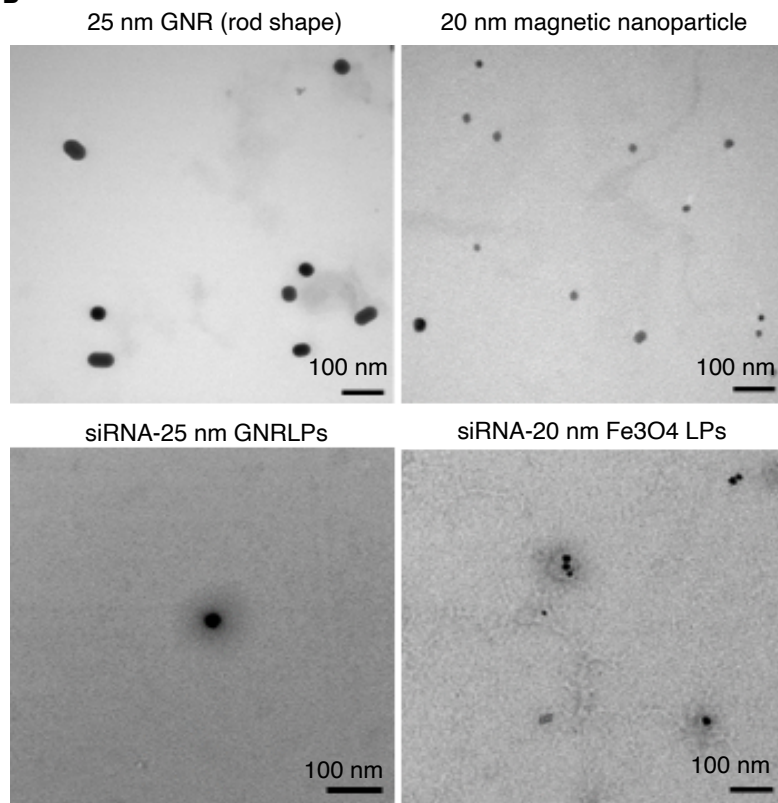



**fig. S5.** Morphological observation of different Auros, AuroLPs, Fe<sub>3</sub>O<sub>4</sub> and FeO<sub>4</sub>LPs. The morphology of 5 nm AuNP, siRNA-5 nm AuroLPs (oval), 20 nm AuNP, siRNA-AuroLPs (oval), 50 nm AuNP, siRNA-50 nm AuroLPs (oval), 25 nm GNR (rod shape), siRNA-25 nm AuroLPs (rod), 20 nm Fe<sub>3</sub>O<sub>4</sub> (oval) and siRNA-20 nm Fe<sub>3</sub>O<sub>4</sub>LPs was visualized by using TEM. Scale bar 100  $\mu$ m.

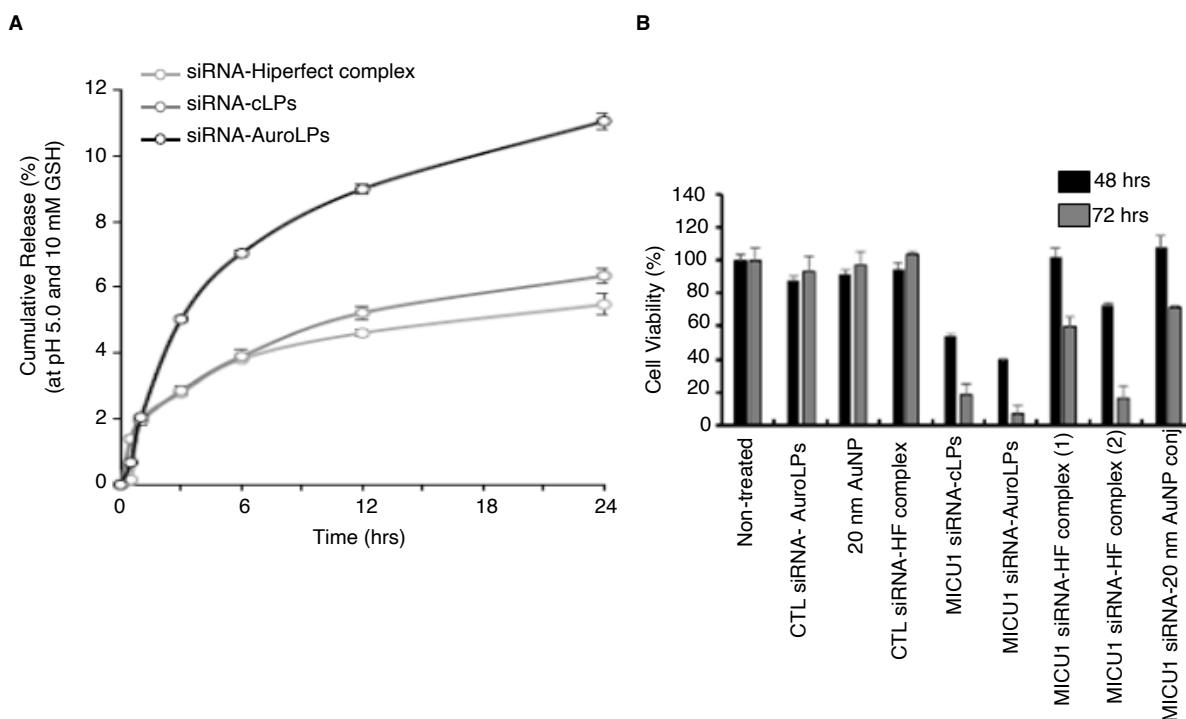

**fig. S6.** siRNA release and cell viability of MICU1-siRNA-loaded AuroLPs. **(A)** The release of siRNA from cLPs AuroLPs and siRNA-HF complex at a lysosomal environment (acidic pH and high GSH) was measured at 15 and 30 mins, 1, 3, 6, 12 and 24h using ribogreen assay. **(B)** Cell viability. Cells were treated with control siRNA-AuroLPs, 20 nm AuNP, CTL-siRNA complex, MICU1-siRNA-AuroLPs, MICU1-siRNA-cLPs, complex (1) (50 nM) or complex (2) (133 nM) and conjugate at a final concentration of 50 nM siRNA. Post 48 and 72 hrs, cell viability was measured by MTT assay (n=5)

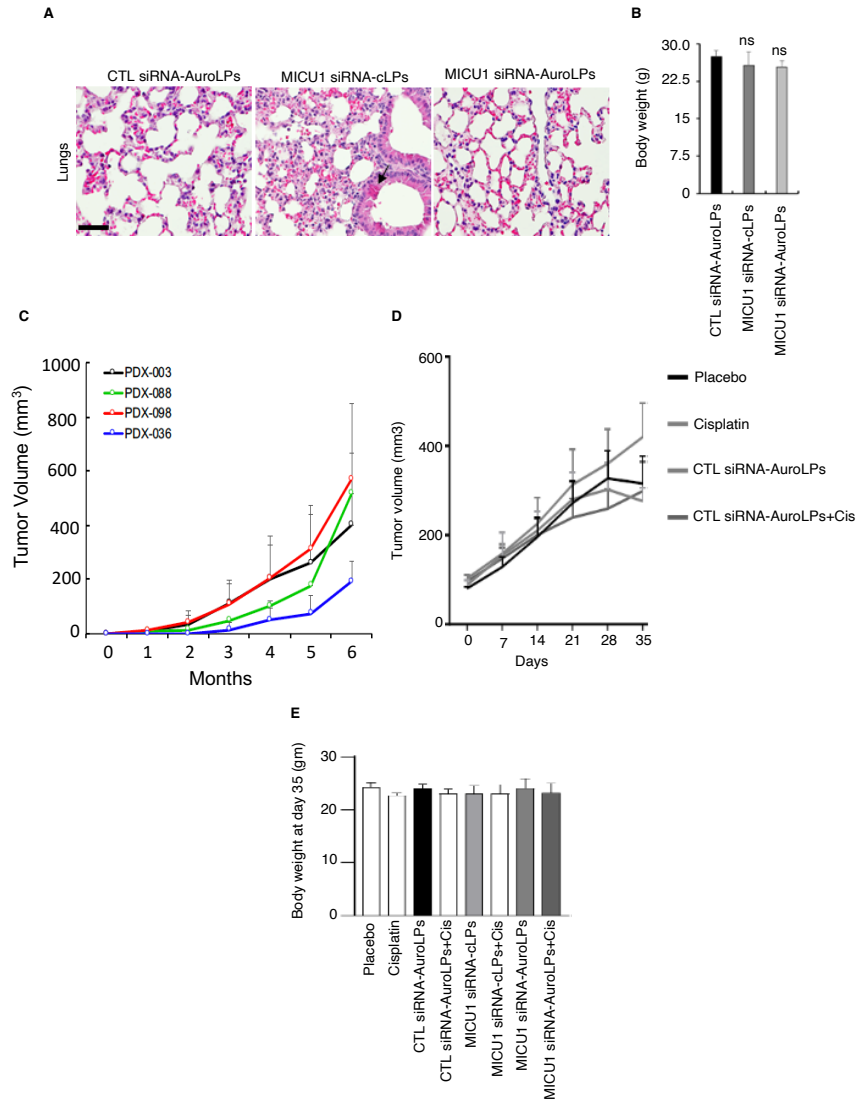

**fig. S7.** Tumor growth rate of PDX model mice and therapeutic and toxicological analysis of AuroLPs in vivo. **(A)** Tissues from lungs of mice treated with CTL-siRNA-AuroLPs, MICU1-siRNA-cLPs and MICU1-siRNA-AuroLPs were collected, fixed with formalin and sectioned at 5  $\mu$ m in size. The representative H&E stained sections of lungs from CTL-siRNA-AuroLPs, MICU1-siRNA-cLPs and MICU1siRNA-AuroLPs groups were shown, where black arrow head indicates inflammatory cells accumulation in lung of siMICU1-cLPs group. Images were captured by Nikon Eclipse Ni Microscope. Scale bar is 50  $\mu$ m. **(C)** Tumor growth rate of ovarian cancer PDXs. Graph represents epithelial ovarian PDX growth rate in NOD/SCID mice. Animals were

subcutaneously implanted with PDX fragment and tumor growth rate was monitored for 6 months. **(B)** Body weight of mice after treatment (OV90 cell line-derived xenograft). **(D)** The control groups including placebo (PBS), cisplatin (0.5 mg/kg), CTL-siRNA-AuroLPs or in combination with i.p injection of cisplatin (0.5 mg/kg). **(E)** The body weight of PDX mice at 35-day was shown.

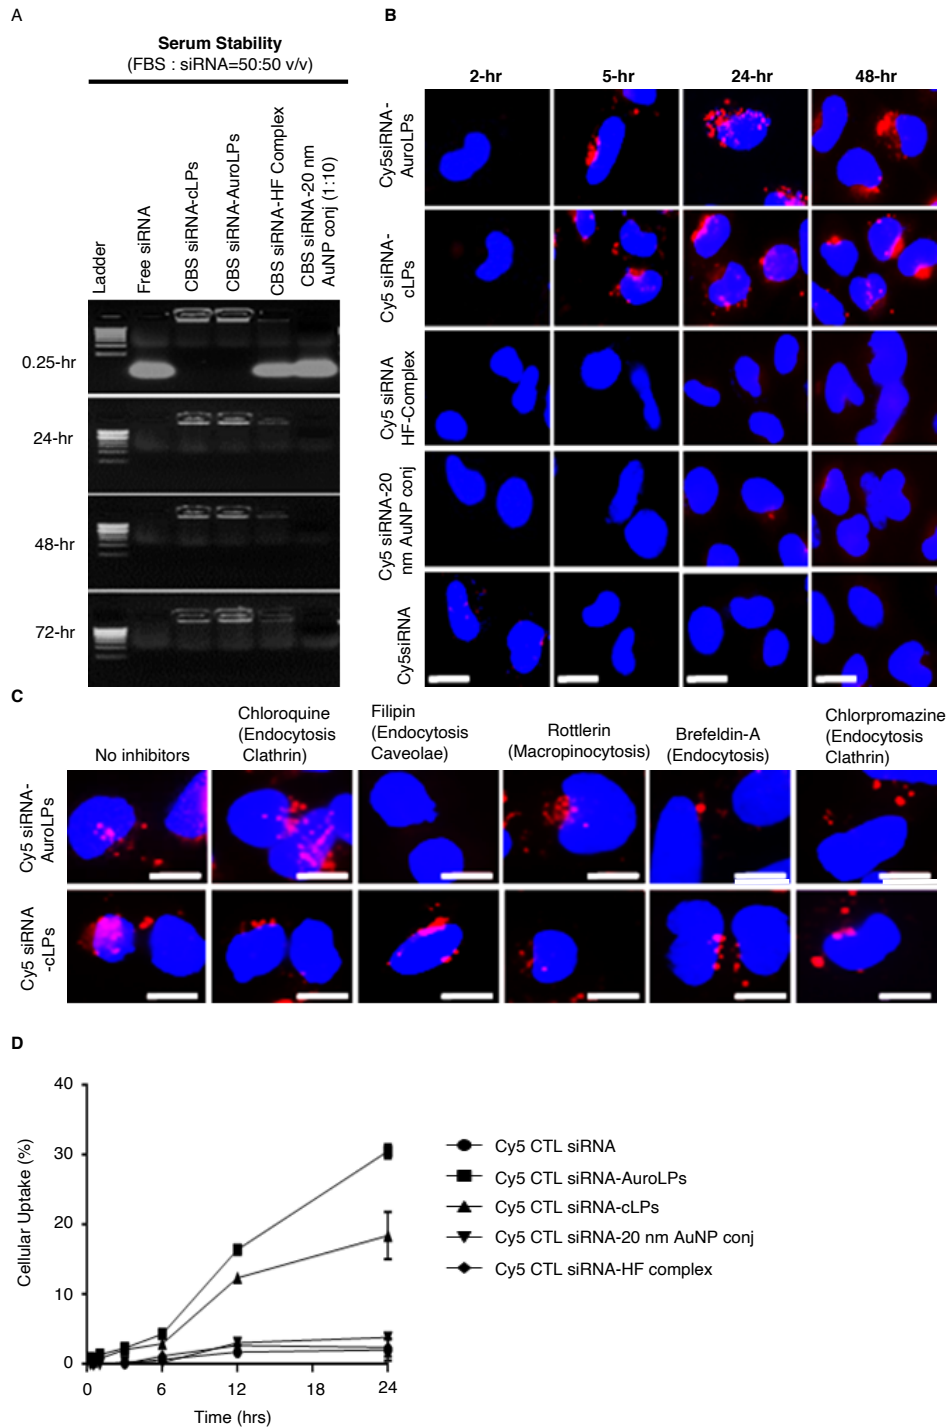

**fig. S8.** Stability, cellular uptake and mechanism of uptake for AuroLPs. **(A)** Serum stability of CBS-siRNA-AuroLPs. CBS-siRNA, CBS-siRNA-cLPs, CBS-siRNA-AuroLPs, complex (Hiperfect+CBS-siRNA) and conjugate (20 nm AuNP + CBS-siRNA) (1  $\mu$ g each) were incubated with 100% FBS (1:1 v/v) at 37°C for 15 mins, 24, 48 and 72 h and 1.5% agarose gel electrophoresis was performed in the presence of TBE buffer. **(B)** Time-dependent cellular uptake of fluorescence labeled siRNA-AuroLPs. Cells were treated with Cy5 siRNA, Cy5 siRNA-LPs, Cy5 siRNA-AuroLPs, conjugate and complex at a dose of 25 nM siRNA. At various time points (2, 5, 24 and 48 h), these cells were fixed, stained nuclei with DAPI and were then visualized by fluorescence microscopy. **(C)** Quantitative cellular uptake of AuroLPs. At the same conditions, cells were incubated with Cy5 siRNA, Cy5 siRNA-cLPs, Cy5 siRNA-AuroLPs, complex and conjugate at a final concentration of 25 nM siRNA. The fluorescence intensity of Cy5 siRNA in cell lysate was quantified by using a CLARIOstar plate reader. **(D)** Uptake mechanism of AuroLPs. Cells were treated with either the presence or the absence of chemical inhibitors, including chlorpromazine, chloroquine, filipin, rottlerin and brefeldin. Post 2-hr, Cy5 CTL-siRNA-cLPs and Cy5 CTL-siRNA-AuroLPs (25 nM CTL-siRNA) were further incubated for 4 hr. These fixed cells were mounted with media containing DAPI and were then visualized under fluorescence microscope. Scale bar 10  $\mu$ m.

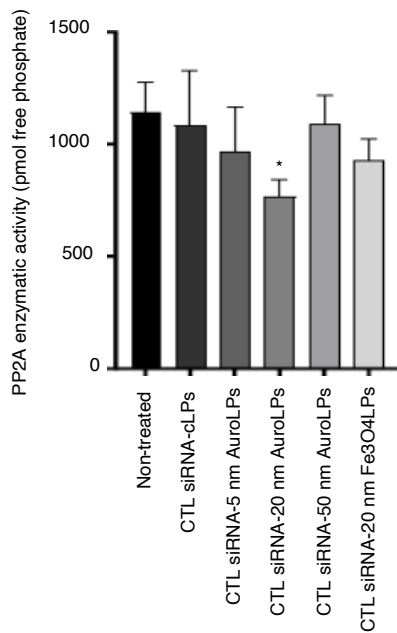

**fig. S9.** Measurement of protein phosphatase 2A (PP2A) enzymes in cell cytosol using immunoprecipitation assay. Cells were incubated with either CTL-siRNA-cLPs, CTL-siRNA-5 nm AuroLPs, -20 nm AuroLPs, -50 nm AuroLPs, -Fe3O4cLPs or remained non-treated for 15 mins. From cell lysates, PP2A proteins were immunoprecipitated and the absorbance, as a read out of PP2A enzymatic activity, was measured at 650 nm by using a CLARIOstar plate reader. The statistical analysis was performed by One-way ANOVA followed by dunnetts' multiple comparison test, mean±s.d, \*p<0.05,

n=4.
